# Supplementary material for: Atmospheric transformation of plant volatiles disrupts host plant finding
Source: PubMed Central journal article supplement (PMC5030639; doi:10.1038/srep33851), 2016-09-21
Supplement: srep33851-s1.pdf [file srep33851-s1.pdf]

## **Supplementary information**

### **Atmospheric transformation of plant volatiles disrupts host plant finding**

Tao Li\*, James D. Blande & Jarmo K. Holopainen

Department of Environmental and Biological Sciences, University of Eastern Finland, Kuopio  
Campus, PO Box 1627, FI-70211, Kuopio, Finland

\*tao.li@uef.fi

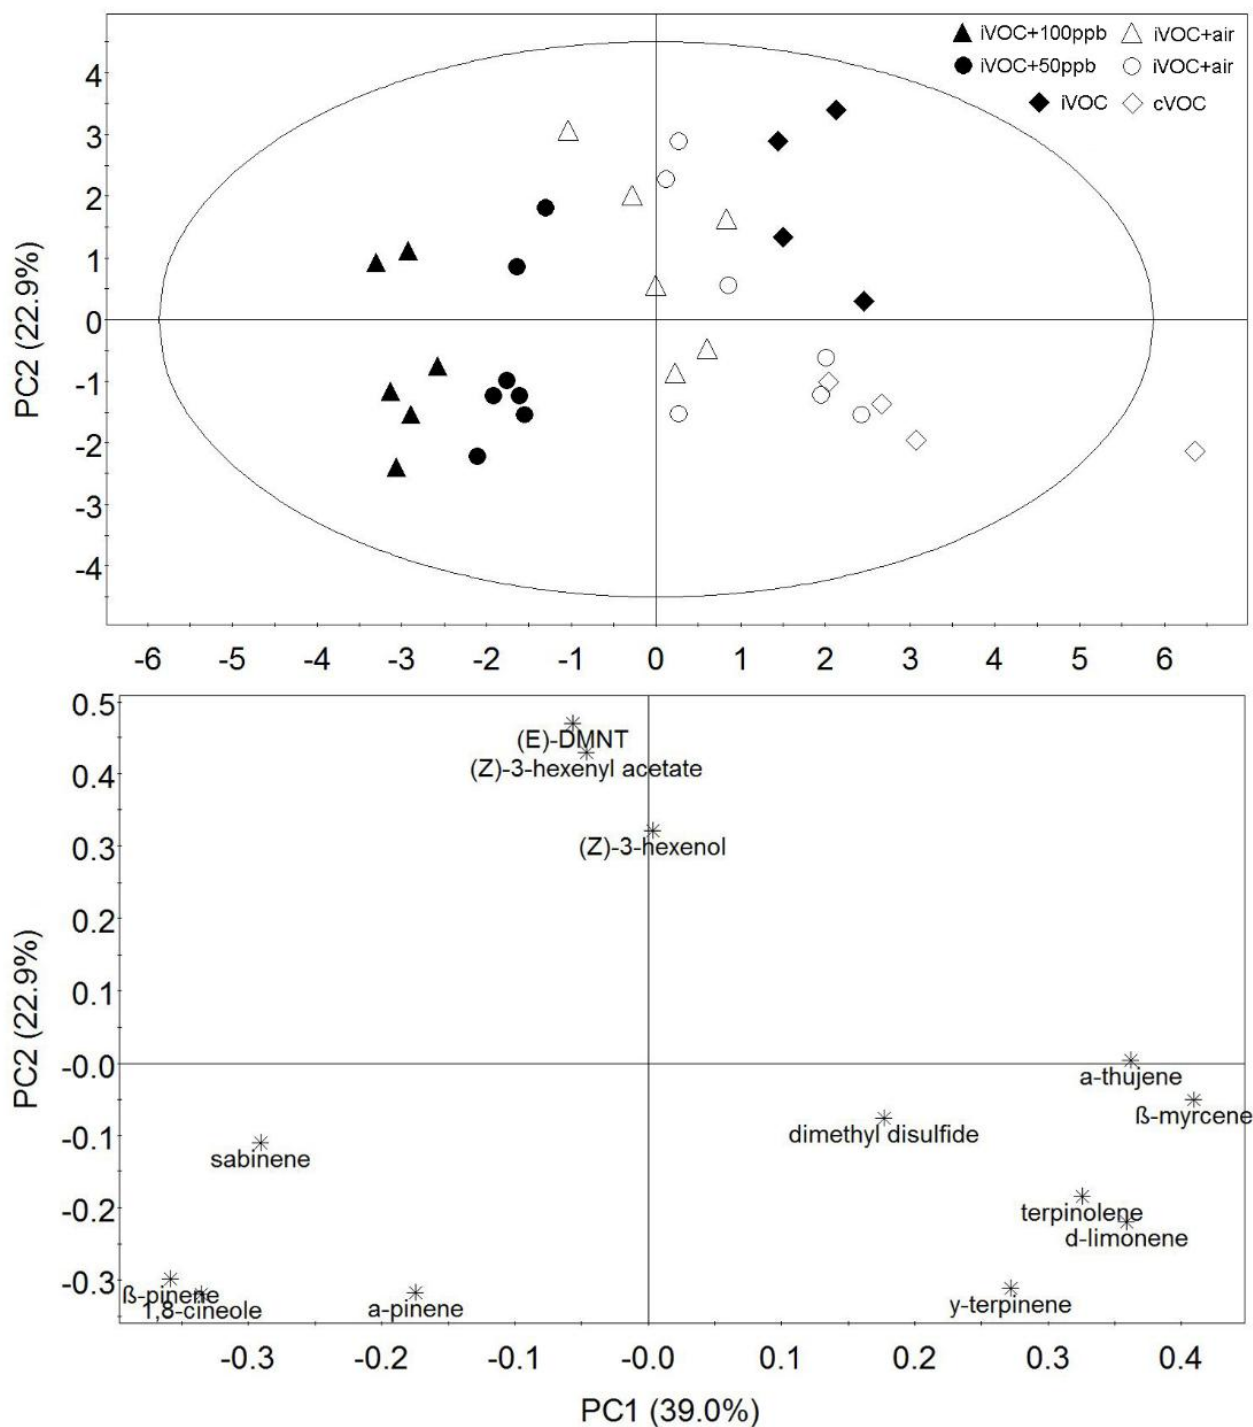

**Supplementary Figure S1.** Principal Component Analysis (PCA) of the VOC blends sampled in experiments 1 (diamonds) and 2 (circles and triangles). Top panel: score plot of the samples, with the percentage of explained variation displayed in parentheses. The O<sub>3</sub>-oxidized blends, particularly when the O<sub>3</sub> level reaches 100 ppb, are clearly separated from the original blends. The ellipse defines the Hotelling's T<sup>2</sup> confidence region (95%). Bottom panel: loading plot of the two components of the PCA, showing the contribution of each of the compounds towards the model.

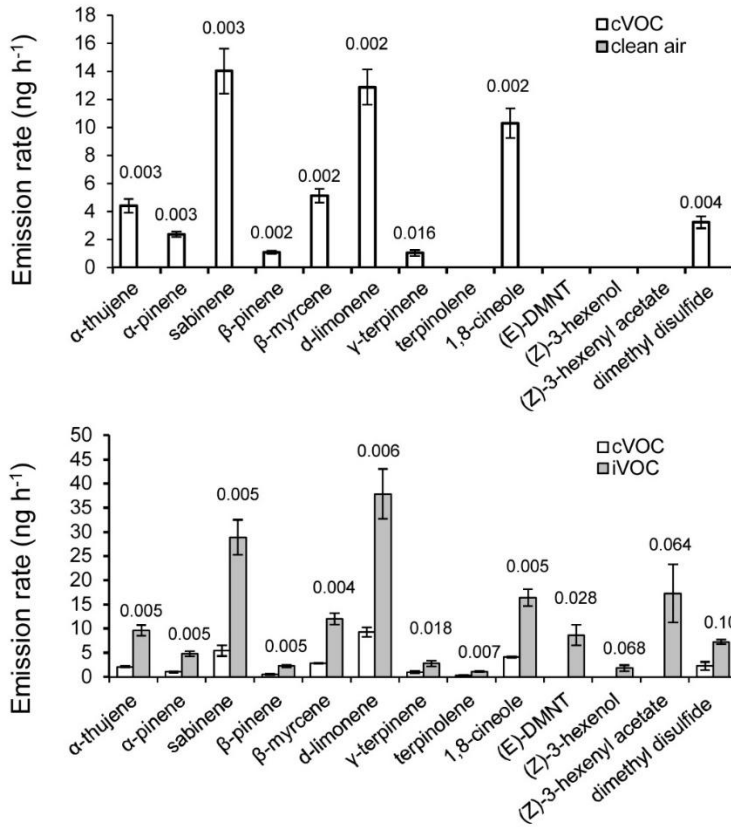

**Supplementary Figure S2.** VOC emission rates (mean  $\pm$  se;  $n = 4$ ) measured at the outlet of Y-tube olfactometers in experiment 1.  $P$  values by independent  $t$  tests are shown over the bars.

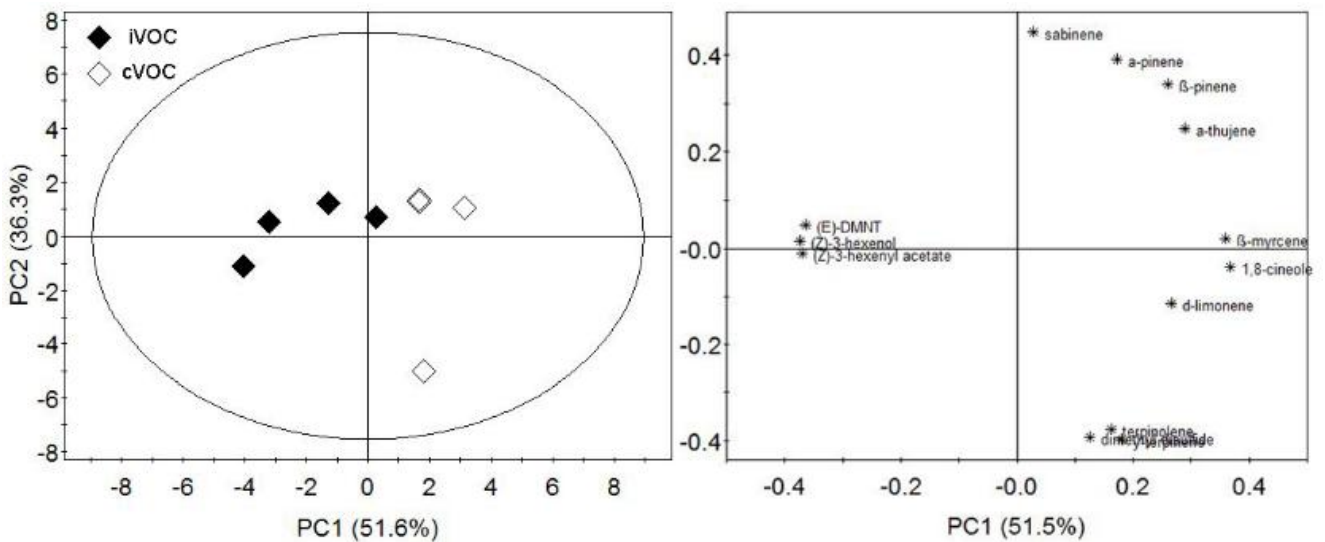

**Supplementary Figure S3.** Principal Component Analysis (PCA) of the VOC blends emitted by detached, control and infested plants in experiment 1. Right panel: score plot; right panel: loading plot. The percentage of explained variation is displayed in parentheses; the ellipse defines the Hotelling's  $T^2$  confidence region (95%).

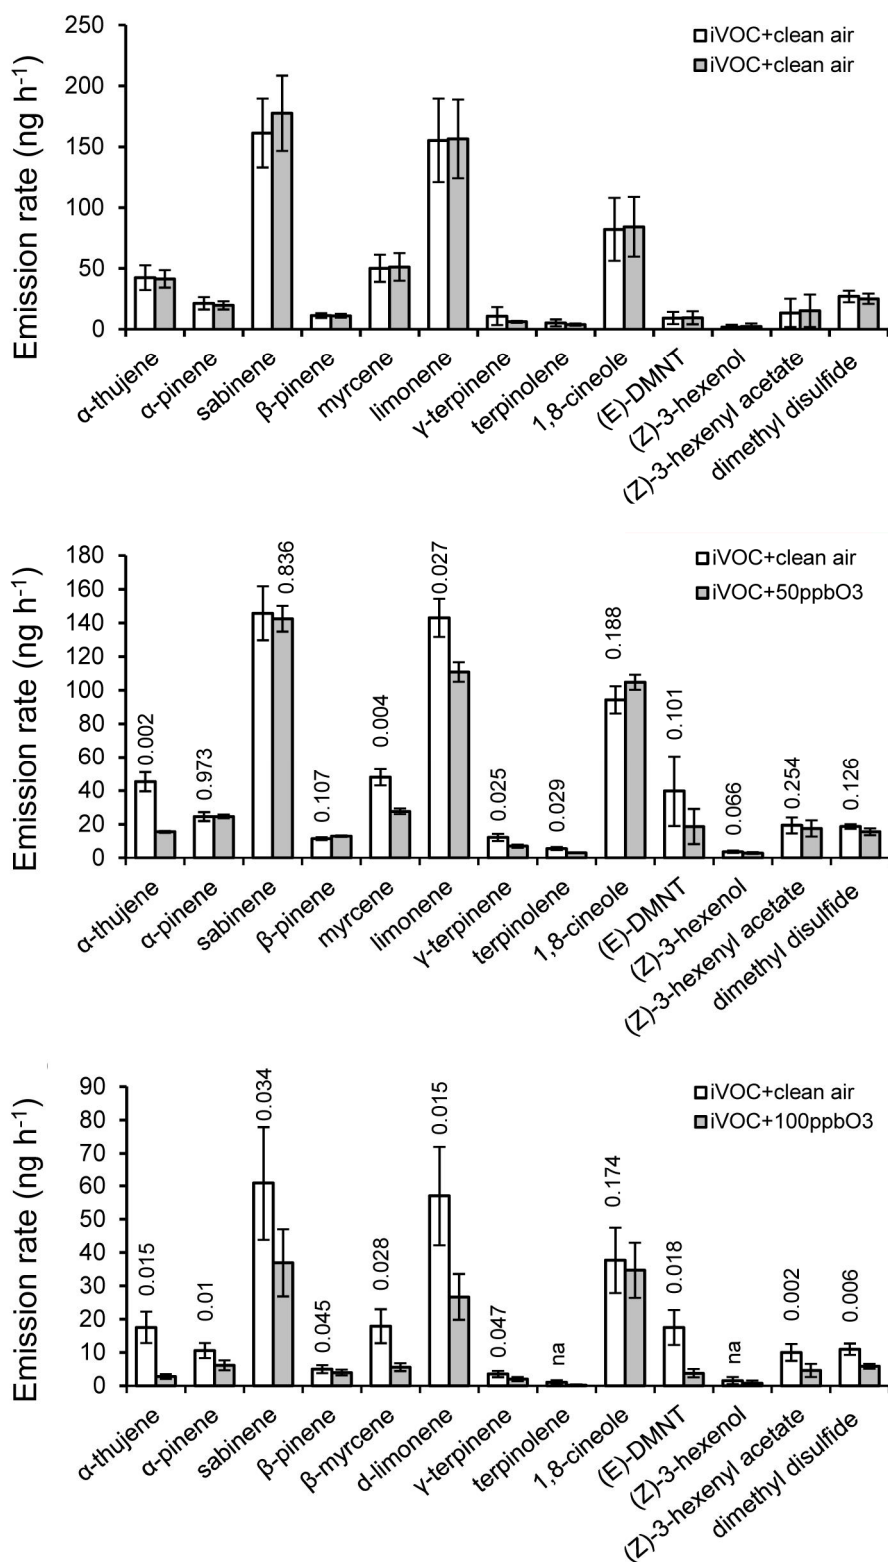

**Supplementary Figure S4.** VOC emission rates (mean ± se) measured at the outlet of Y-tube olfactometers in experiment 2. *P* values by paired *t* tests are shown over the bars. *n* = 3, 7 and 6 for top, middle and bottom panel, respectively.

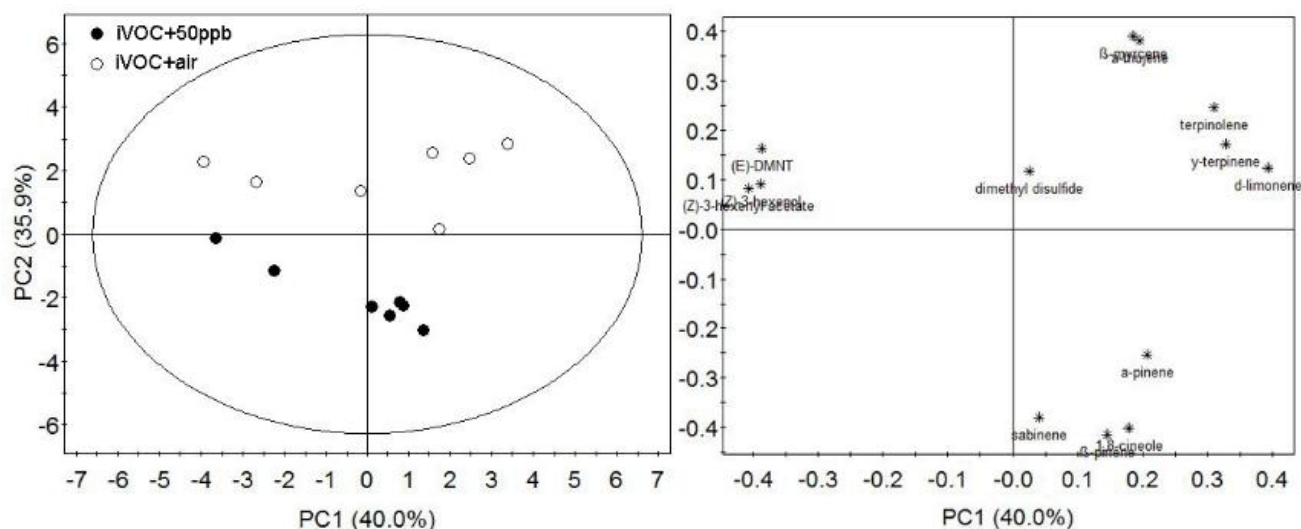

**Supplementary Figure S5.** Principal Component Analysis (PCA) of the iVOC blends mixed with 50 ppb O<sub>3</sub> and clean air in experiment 2. Right panel: score plot; right panel: loading plot. The percentage of explained variation is displayed in parentheses; the ellipse defines the Hotelling's T<sup>2</sup> confidence region (95%).

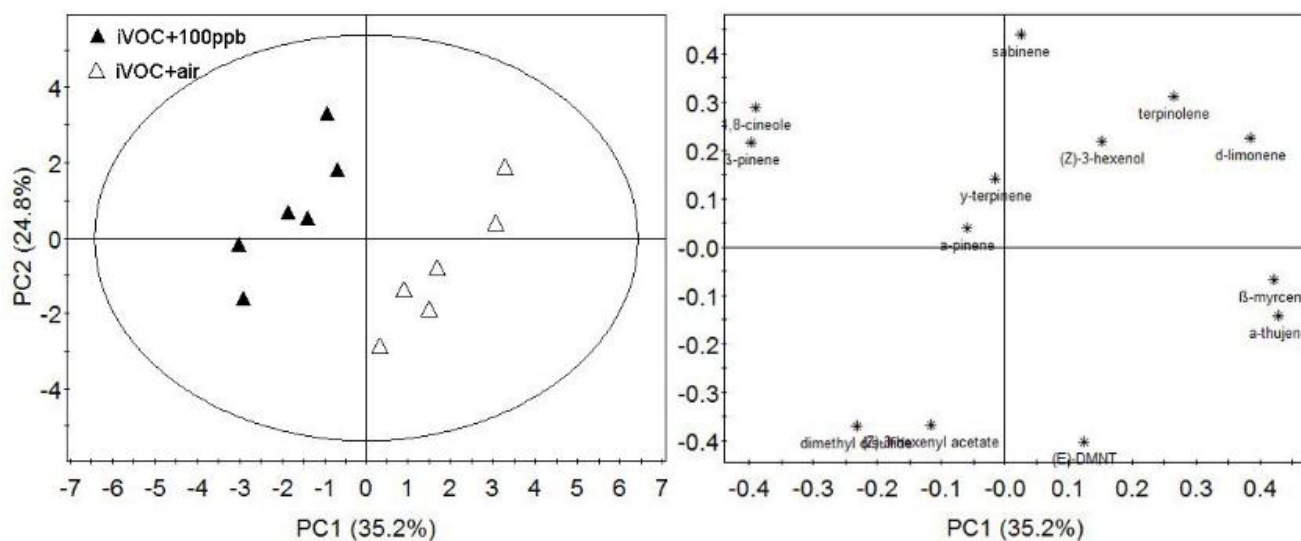

**Supplementary Figure S6.** Principal Component Analysis (PCA) of the iVOC blends mixed with 100 ppb O<sub>3</sub> and clean air in experiment 2. Right panel: score plot; right panel: loading plot. The percentage of explained variation is displayed in parentheses; the ellipse defines the Hotelling's T<sup>2</sup> confidence region (95%).

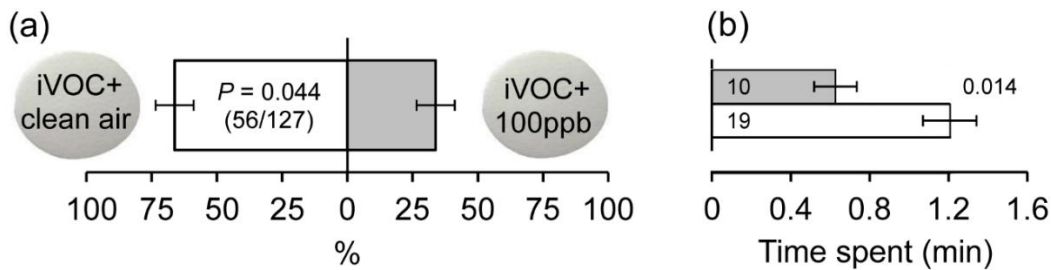

**Supplementary Figure S7.** Orientation preference towards (a) and time (b) spent on filters exposed to *P. xylostella*-induced broccoli VOCs mixed with 100 ppb O<sub>3</sub> versus clean air. Bars represent treatment mean  $\pm$  se; *P* values for binomial test (a) or Mann-Whitney *U* test (b) are given.

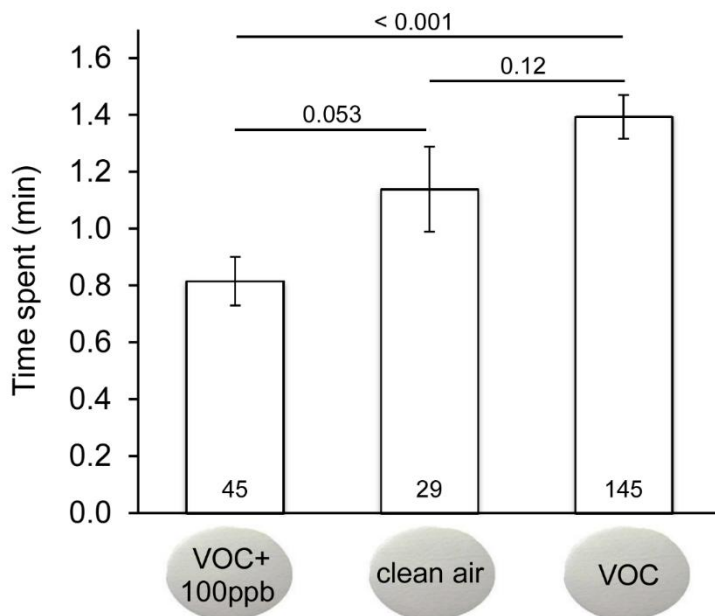

**Supplementary Figure S8.** Mean time ( $\pm$  se) spent by *P. xylostella* larvae searching on Teflon filters exposed to clean air, original VOC blends (VOC) or oxidized VOC blends by 100ppb O<sub>3</sub> (VOC+100ppb). Data from different filter bioassays were pooled, categorized into three treatment groups, namely, filters exposed to O<sub>3</sub>-transformed VOCs, original VOCs, and analyzed with Kruskal-Wallis test, followed by pairwise comparisons with Mann-Whitney *U* test.
